# Supplementary material for: Target-stimulated metallic HgS nanostructures on a DNA-based polyion complex membrane for highly efficient impedimetric detection of dissolved hydrogen sulfide
Source: Royal Society of Chemistry journal article supplement (doi:10.1039/c3cc46869k), 2013-01-01
Supplement: c3cc46869k.pdf [file c3cc46869k.pdf]

## Electronic Supplementary Information

### **Target-stimulated metallic HgS nanostructures on DNA-based polyion complex membrane for highly efficient impedimetric detection of dissolved hydrogen sulfide**

Junyang Zhuang, Libing Fu, Wenqiang Lai, Dianping Tang\* and Guonan Chen

*Key Laboratory of Analysis and Detection of Food Safety (Ministry of Education & Fujian Province), Department of Chemistry, Fuzhou University, Fuzhou 350108, P.R. China*

E-mail: [dianping.tang@fzu.edu.cn](mailto:dianping.tang@fzu.edu.cn) (D. Tang)

Fax: +86 591 2286 6135; Tel.: +86 591 2286 6125.

## EXPERIMENTAL SECTION

**Reagents and Chemicals.** Oligonucleotides designed in this study (5'-SH-TTTTT TTTTT TTTTT TTTTT TTTTT-3') were synthesized by Sangon Biotech. Co., Ltd (Shanghai, China), which were purified by HPLC and confirmed by mass spectrometry. DNA stock solution was obtained by dissolving oligonucleotides in tris-HCl buffer solution (pH 7.4). Each oligonucleotide was heated to 90 °C for 5 min, and slowly cooled down to room temperature before usage. HgCl<sub>2</sub> and Na<sub>2</sub>S·9H<sub>2</sub>O were purchased from Alfa Aesar®. Tris(2-carboxyethyl) phosphine (TCEP) and 6-mercaptopentanol was purchased from Tokyo chemical industry Co., Ltd (Japan). Mercaptopentanol (MCH) was purchased from Tokyo Chem. Inc. (Japan). New bore calf serum was product of Dingguo Biotechnol. Co., Ltd. (Beijing, China). All the other chemicals were of analytical grade, and used without further purification. Ultrapure water obtained from a Millipore water purification system ( $\geq 18$  M $\Omega$ , Milli-Q, Millipore) was used in all runs.

**Fabrication of DNA-Modified Gold Electrode.** A gold electrode with 2 mm in diameter was polished repeatedly with 1.0 and 0.3  $\mu$ m alumina slurry, followed by successive sonication in distilled water and ethanol for 5 min and dried in air. Prior to modification, the gold electrode was cleaned with hot piranha solution (a 3:1 mixture of H<sub>2</sub>SO<sub>4</sub> and H<sub>2</sub>O<sub>2</sub>. *Cautions!*) for 10 min, and then continuously scanned within the potential range of -0.3 to 1.5 V in freshly prepared deoxygenated 0.5 M H<sub>2</sub>SO<sub>4</sub> until a voltammogram characteristic of the clean gold electrode was established.<sup>S1</sup> After the cleaned electrode was thoroughly rinsed with water and absolute ethanol, the cleaned electrode was immersed into 10 mM Tris-HCl buffer (pH 7.4, 0.5 M NaCl) solution containing 1.0  $\mu$ M poly-T<sub>(25)</sub> DNA oligonucleotide (*Note*: Before incubation, the capture probe was pretreated by TCEP to split the formed disulfide between the thiolated DNA probes),<sup>S2</sup> and incubated for 2 h at room temperature (RT). During this process, the thiolated DNA probe was conjugated onto the gold electrode through the Au-S bond. After rinsing with distilled water, the modified gold electrode was incubated with 1.0 mM 6-mercaptopentanol in 10 mM Tris-HCl buffer, pH 7.4, for 60 min. Finally, the DNA-modified electrode was suspended over pH 7.4 PBS at 4 °C when not in use.

**Impedimetric Measurement.** All impedimetric measurements were performed with an AutoLab  $\mu$ AUTIII.FRA2.v electrochemical workstation (Eco Chemie, The Netherlands). A conventional three-electrode system used in the measurements consists of a modified gold electrode as the working electrode, Pt wire as the counter electrode, and an Ag/AgCl reference electrode. Prior to incubation with target  $\text{H}_2\text{S}$ , the modified electrode was initially immersed into 10 mM Tris-HCl buffer (pH 7.4) solution containing 10  $\mu\text{M}$   $\text{Hg}^{2+}$ , and incubated for 15 min at RT. During this process,  $\text{Hg}^{2+}$  ions were intercalated between T bases through T- $\text{Hg}^{2+}$ -T coordination chemistry.<sup>S3</sup> The resulting electrode was washed thoroughly with 10 mM Tris-HCl buffer (pH 7.4), and used for the detection of target  $\text{H}_2\text{S}$ .

Before impedimetric measurement,  $\text{H}_2\text{S}$  standards with various concentrations were prepared according to the literature.<sup>S4</sup> Initially,  $\text{Na}_2\text{S}$  standards with various concentrations were prepared by using 10 mM Tris-HCl buffer (pH 6.0) solution as the sample matrix. To detect  $\text{H}_2\text{S}$  gas, 100  $\mu\text{L}$  of  $\text{Na}_2\text{S}$  standards solution was added into 0.5-mL centrifuge tube and the as-prepared electrode was inserted into the tube subsequently (*Note:* The electrode was not in physical contact with the  $\text{H}_2\text{S}$  containing solution). The gap between tube and the electrode was sealed by parafilm rapidly. The headspace between the solution and the surface of electrode was about 30  $\mu\text{L}$ .  $\text{H}_2\text{S}$  was allowed to form from  $\text{Na}_2\text{S}$ , and react with the  $\text{Hg}^{2+}$  ions in the T- $\text{Hg}^{\text{II}}$ -T base pairs for 30 min. Afterward, the resultant electrode was monitored by using the EIS in 5.0 mM  $\text{Fe}(\text{CN})_6^{4-/3-}$  containing 0.1 M KCl at frequency  $10^{-2}$  to  $10^5$  Hz at the formal potential of 220 mV, using alternating voltage of 10 mV. A Nyquist plot ( $Z_{\text{re}}$  vs.  $Z_{\text{im}}$ ) was drawn to analyze the impedance results. Analyses are always made in triplicate.

**Optimization of Experimental Conditions.** To achieve an optimal impedimetric signal, some experimental conditions concluding the conjugation time for T- $\text{Hg}^{2+}$ -T and the precipitation time for  $\text{HgS}$  should be investigated. Fig. S1 shows the effect of various conjugation times for T- $\text{Hg}^{2+}$ -T on the signal of the impedimetric assay method (200 nM  $\text{H}_2\text{S}$  used in this case). The resistance increased with the increment of conjugation time, and tended to level off after 15 min. Longer conjugation time did not cause the obvious increase in the resistance. Therefore, 15 min was used as the conjugation time for the formation of T- $\text{Hg}^{2+}$ -T in this work.

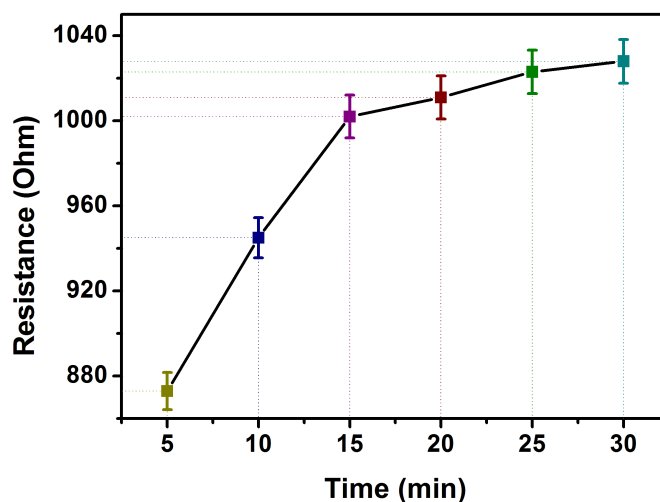

**Fig. S1** Influence of the conjugation time between  $\text{Hg}^{2+}$  and T bases on the signal of the impedimetric assay method.

In this work, the strong electrochemical signal mainly derived from the formed HgS nanostructure on the electrode toward the disturbance of  $\text{Fe}(\text{CN})_6^{3-}/\text{Fe}(\text{CN})_6^{4-}$ . So, the amount of HgS precipitation on the electrode would directly affect the analytical properties of the developed method. As seen from Fig. S2, the resistance ( $R_{\text{et}}$ ) of the modified electrode increased with the increment of incubation time, and the optimal response was achieved at 30 min. Thus, 30 min was selected as the incubation time for the precipitation of HgS at acceptable throughput.

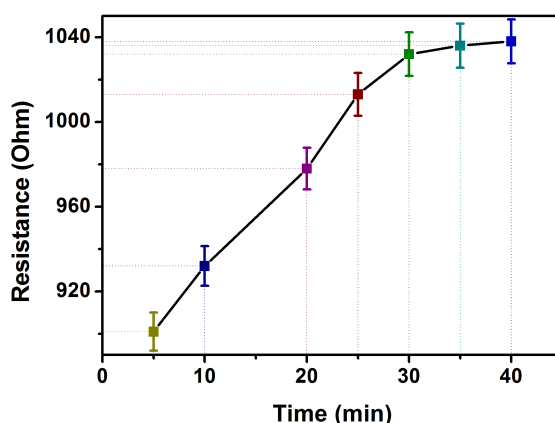

**Fig. S2** Influence of the incubation time between target  $\text{H}_2\text{S}$  and T- $\text{Hg}^{2+}$ -T on the signal of the impedimetric assay method (200 nM  $\text{H}_2\text{S}$  used as an example).

**Table S1. Precision and Reproducibility (Coefficient of Variation, CV) of Determinations Using Identical Batches of DNA-Modified Electrodes Throughout**

| item        | $C_{[H_2S]}$ ,<br>nM | identical batches; <sup>a</sup> assay concentration (nM) |     |     |     |     | CV<br>(%, $n = 5$ ) |
|-------------|----------------------|----------------------------------------------------------|-----|-----|-----|-----|---------------------|
|             |                      | 1                                                        | 2   | 3   | 4   | 5   |                     |
| intra-assay | 5                    | 5.2                                                      | 4.6 | 4.3 | 5.1 | 5.3 | 8.8                 |
|             | 200                  | 189                                                      | 213 | 203 | 221 | 208 | 5.8                 |
|             | 600                  | 645                                                      | 603 | 626 | 587 | 593 | 4.0                 |
| inter-assay | 5                    | 4.3                                                      | 5.3 | 4.7 | 5.5 | 4.6 | 10.3                |
|             | 200                  | 243                                                      | 235 | 213 | 189 | 219 | 9.6                 |
|             | 600                  | 564                                                      | 591 | 667 | 632 | 587 | 6.7                 |

<sup>a</sup>The CVs of intra-assay were obtained by using the same-batch DNA-modified electrodes, whereas the CVs of the inter-assay were achieved by using various batches.

## REFERENCE

- S1. M. Xu, J. Zhuang, X. Chen, G. Chen and D. Tang, *Chem. Commun.*, 2013, **49**, 7304.  
S2. M. Labib, N. Khan, S. Ghobadloo, J. Chen, J. Pezacki and M. Berezovski, *J. Am. Chem. Soc.*, 2013, **135**, 3027.  
S3. J. Zhuang, L. Fu, D. Tang, M. Xu, G. Chen and H. Yang, *Biosens. Bioelectron.*, 2013, **39**, 315.  
S4. H. Peng, Y. Cheng, C. Dai, A. King, B. Predmore, D. Lefer and B. Wang, *Angew. Chem., Int. Ed.*, 2011, **50**, 9672.
